# Supplementary material for: Accumulation of the transcription factor ABA-insensitive (ABI)4 is tightly regulated post-transcriptionally
Source: PubMed Central journal article supplement — J Exp Bot. 2011 Apr 19;62(11):3971–9. doi: 10.1093/jxb/err093 (PMC3134352; doi:10.1093/jxb/err093), 2011-04-19

# Supplementary Material for

**Title:** Accumulation of the transcription factor ABA-Insensitive (ABI)4 is tightly regulated post-transcriptionally

**Running Title:** Post-transcriptional regulation of ABI4

**Authors:** Ruth Finkelstein, Tim Lynch, Wendy Reeves, Michelle Petitfils, Mike Mostachetti

**Address:** Department of Molecular, Cellular and Developmental Biology, University of California at Santa Barbara, Santa Barbara, CA 93106

**Email addresses:** [finkelst@lifesci.ucsb.edu](mailto:finkelst@lifesci.ucsb.edu), [lynch@lifesci.ucsb.edu](mailto:lynch@lifesci.ucsb.edu), [reeves@lifesci.ucsb.edu](mailto:reeves@lifesci.ucsb.edu), [mpetit52@gmail.com](mailto:mpetit52@gmail.com), [mjmostachetti@berkeley.edu](mailto:mjmostachetti@berkeley.edu)

**Corresponding author:** Ruth Finkelstein

**Phone:** (805) 893-4800

**Fax:** (805) 893-4724

**Date of Submission:** December 20, 2010

**Number of Tables:** 0

**Number of Figures:** 7, plus 6 supplementary

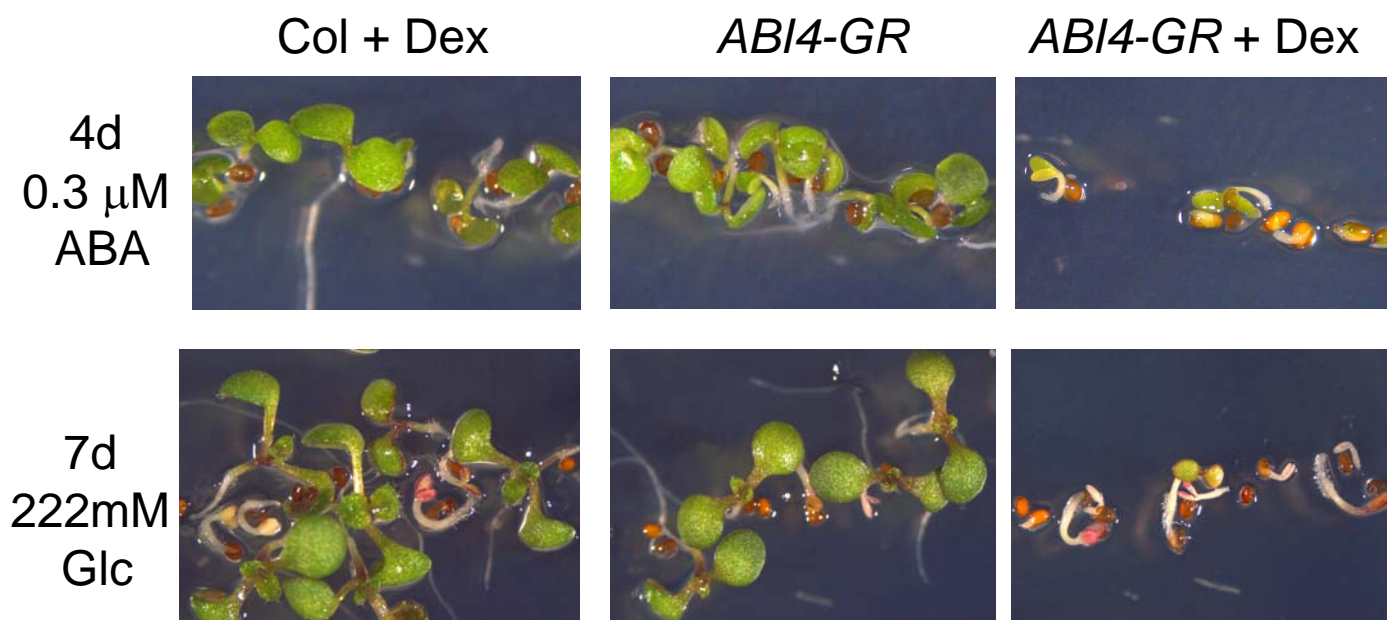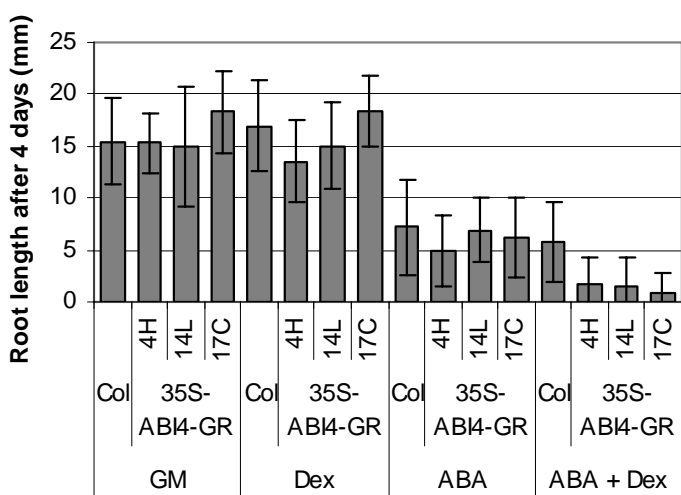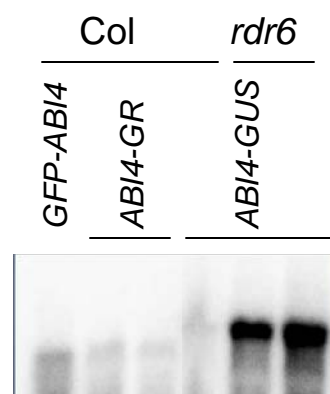

**Figure S1.** 35S-ABI4-GR transgenes confer Dexamethasone(Dex)-dependent hypersensitivity to ABA inhibition of germination and root growth, and glucose (Glc) inhibition of germination and seedling growth. Transcript levels for these ABI4 fusion transgenes are similar to those for the GFP- and -GUS fusions in a wild-type background.

Col

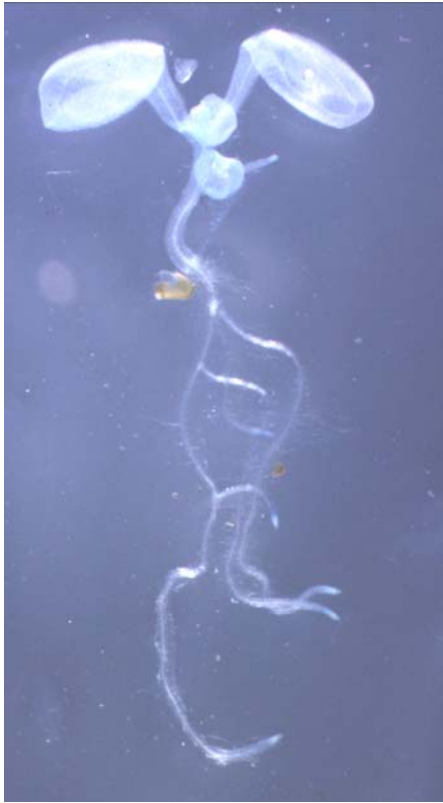

*rdr6*

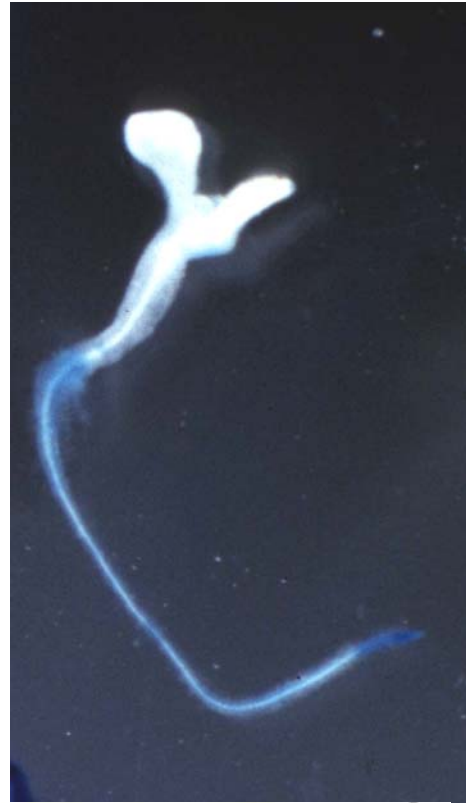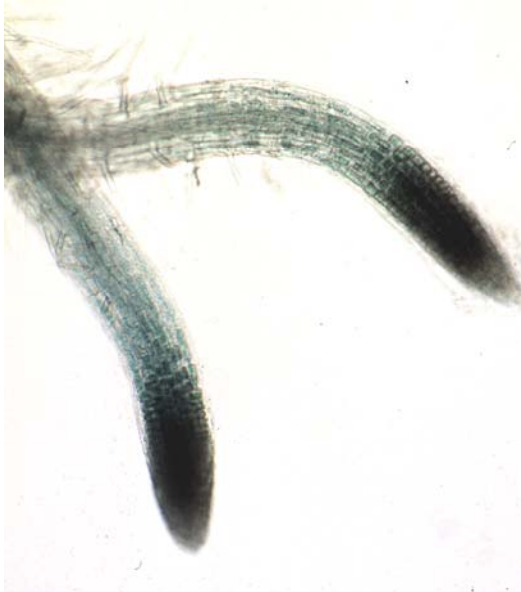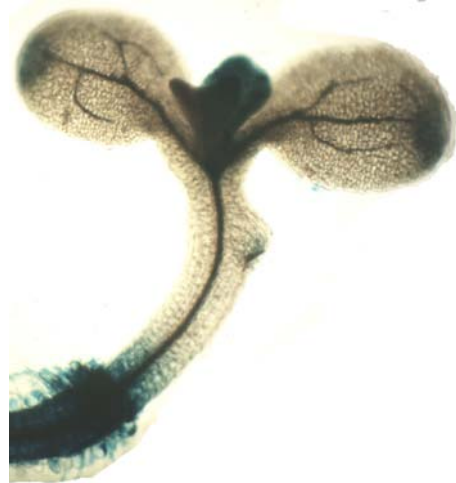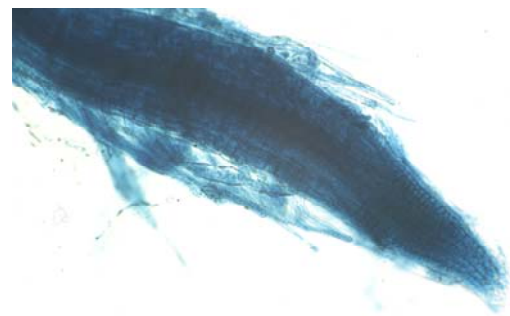

**Figure S2.** *35S-ABI4-GUS* activity in Col (left) and *rdr6* (right) backgrounds. Fluorometrically assayed GUS activity is roughly ten-fold higher in the *rdr6* background. .

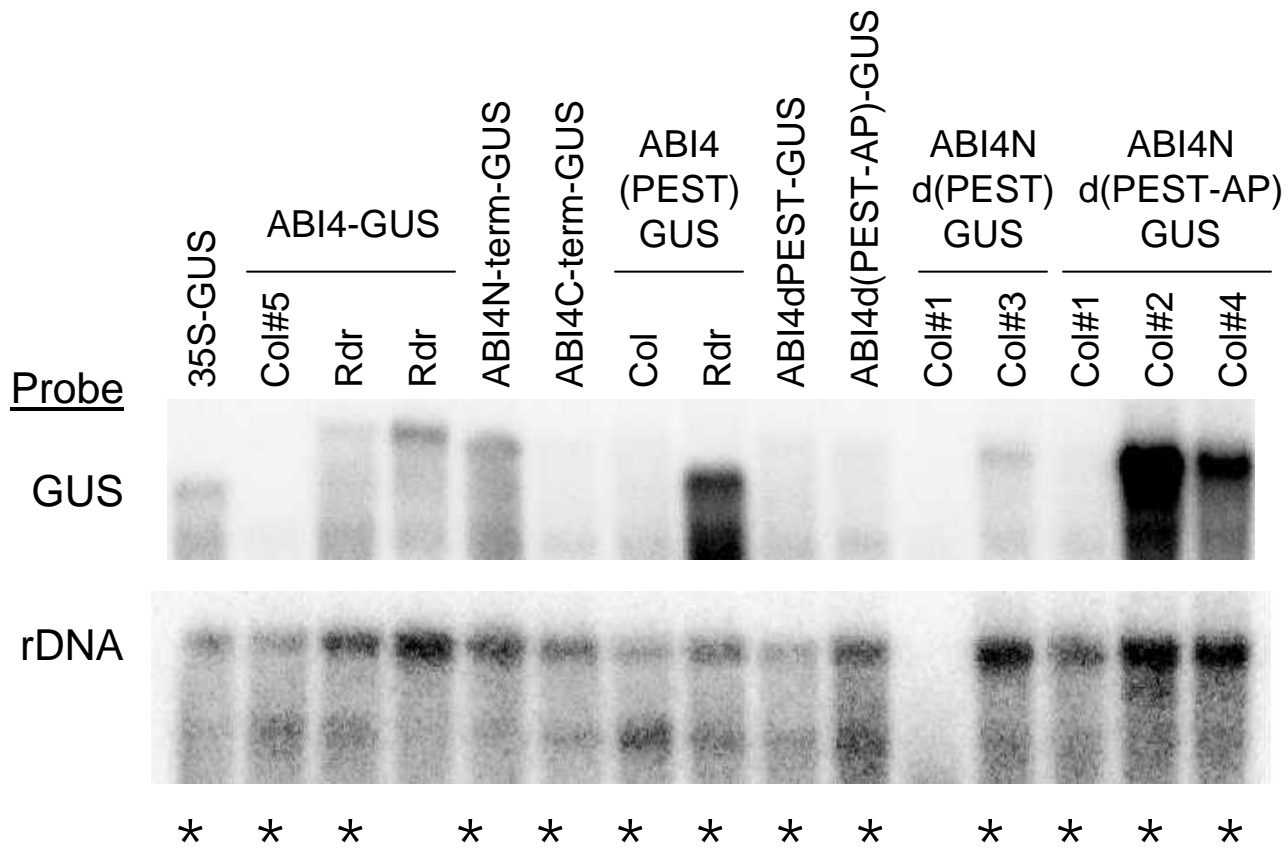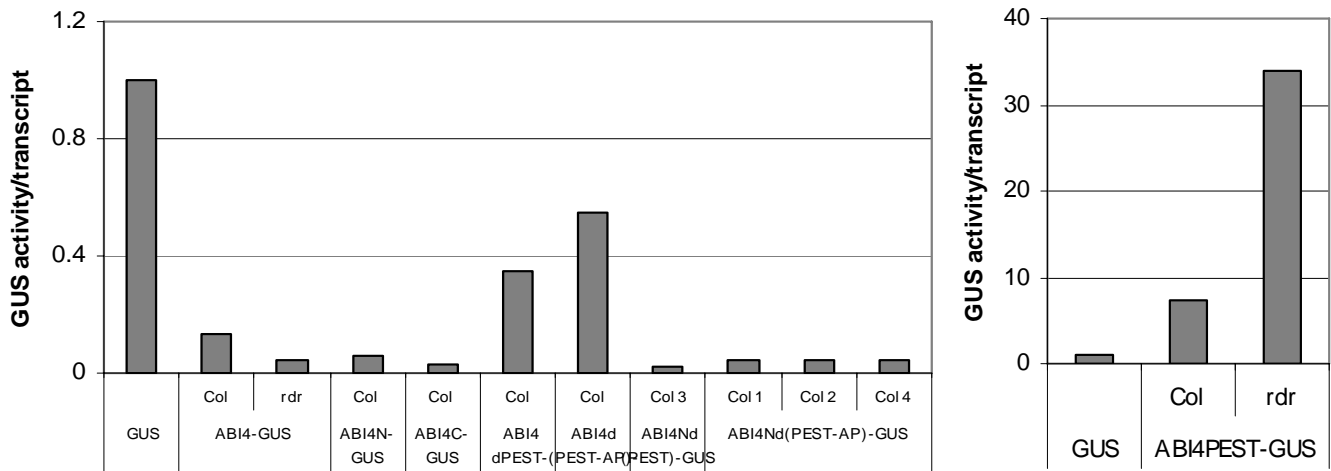

**Figure S3.** Comparison of GUS transcript and activity levels shows that all ABI4 domain fusion constructs displayed except that containing only the PEST domain accumulate fusion proteins relatively inefficiently. \*= samples represented in graph of activity/transcript

### 10d seedling growth on 6% glucose

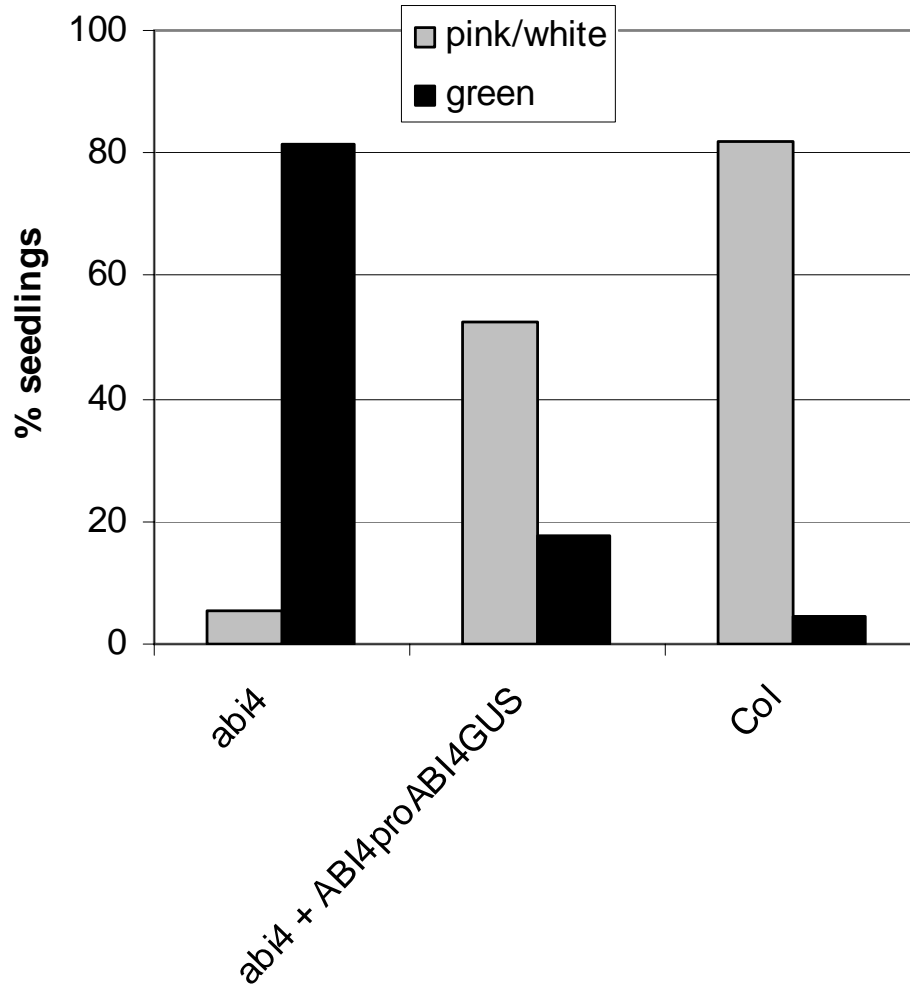

Figure S4. *ABI4pro-ABI4-GUS* weakly complements the *abi4* mutation, suppressing the glucose resistance of this background.

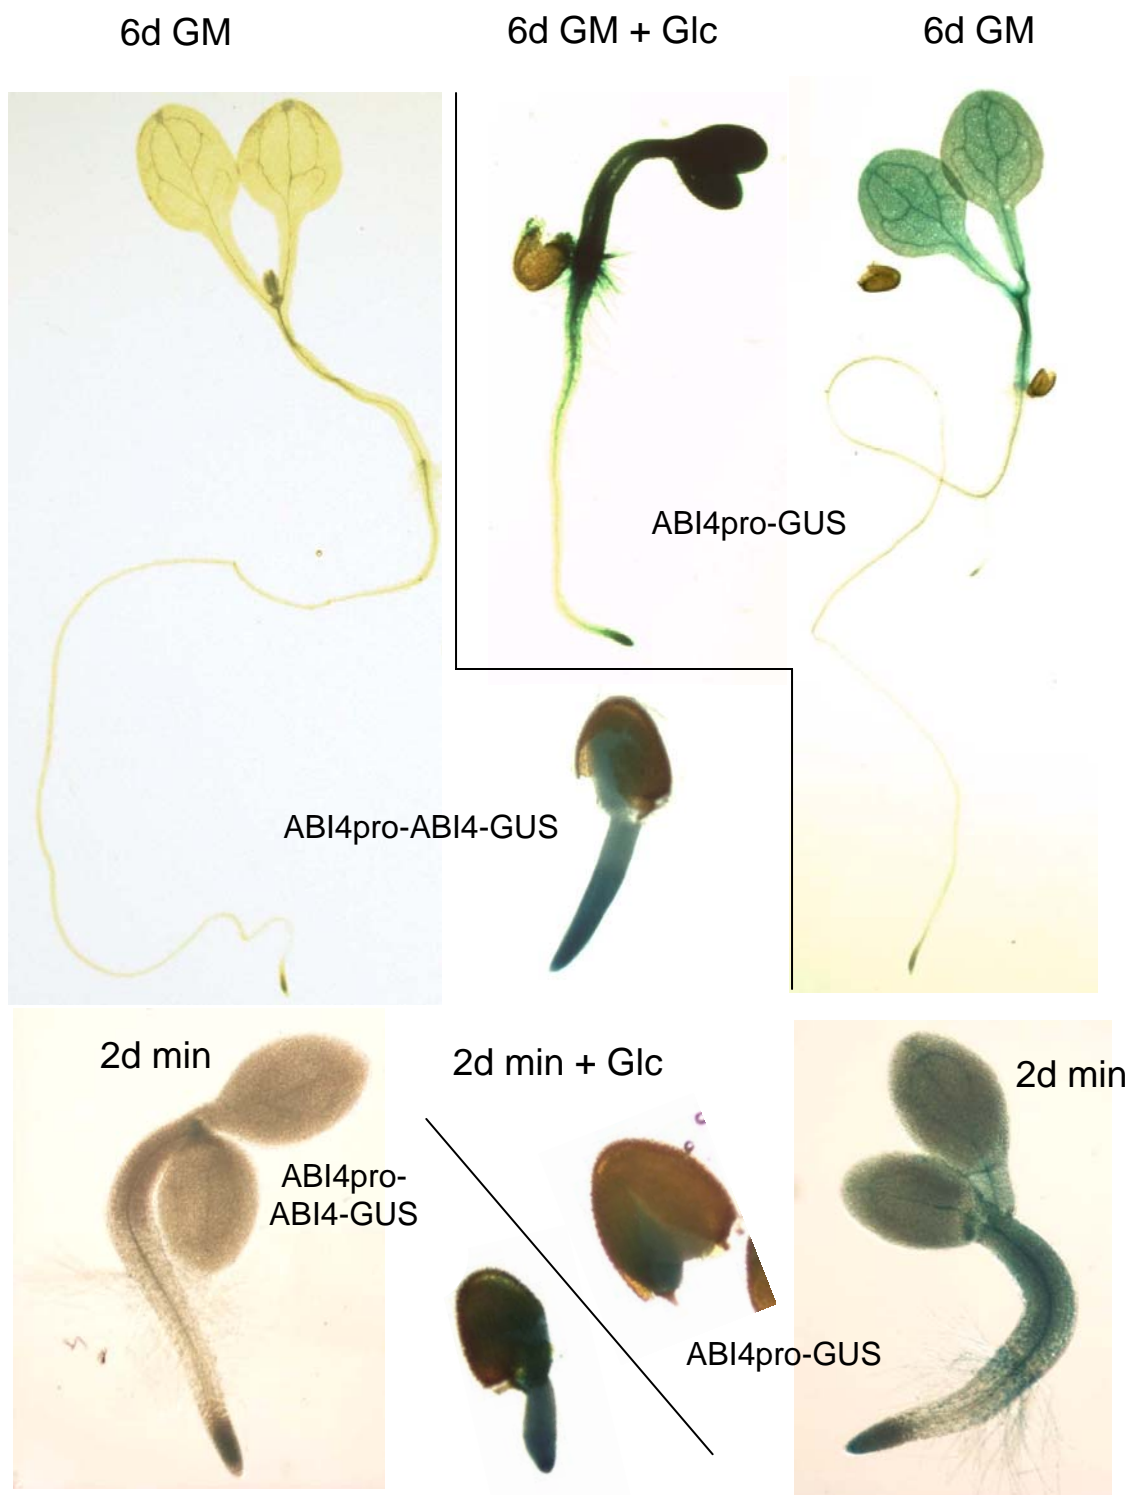

**Figure S5.** Histochemical staining of GUS activity in seedlings of the indicated genotypes (*ABI4pro-GUS* and *ABI4pro-ABI4-GUS*) grown 6d on GM with or without 5% glucose (top), or 2d on minimal medium with or without 6% glucose (bottom).

2d GM:

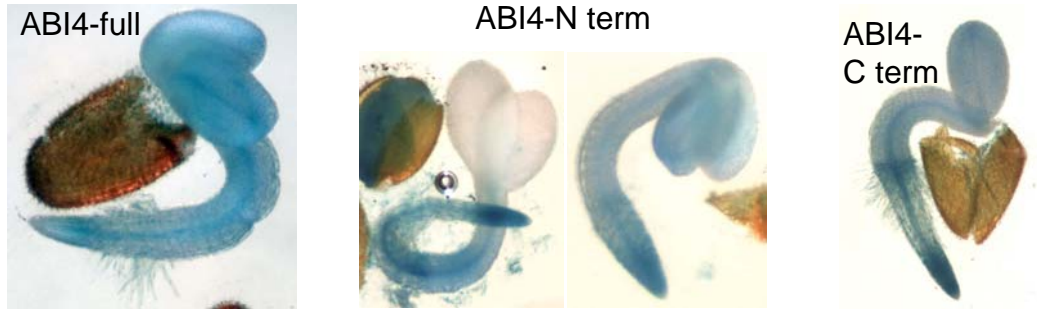

5-9d GM Kn:

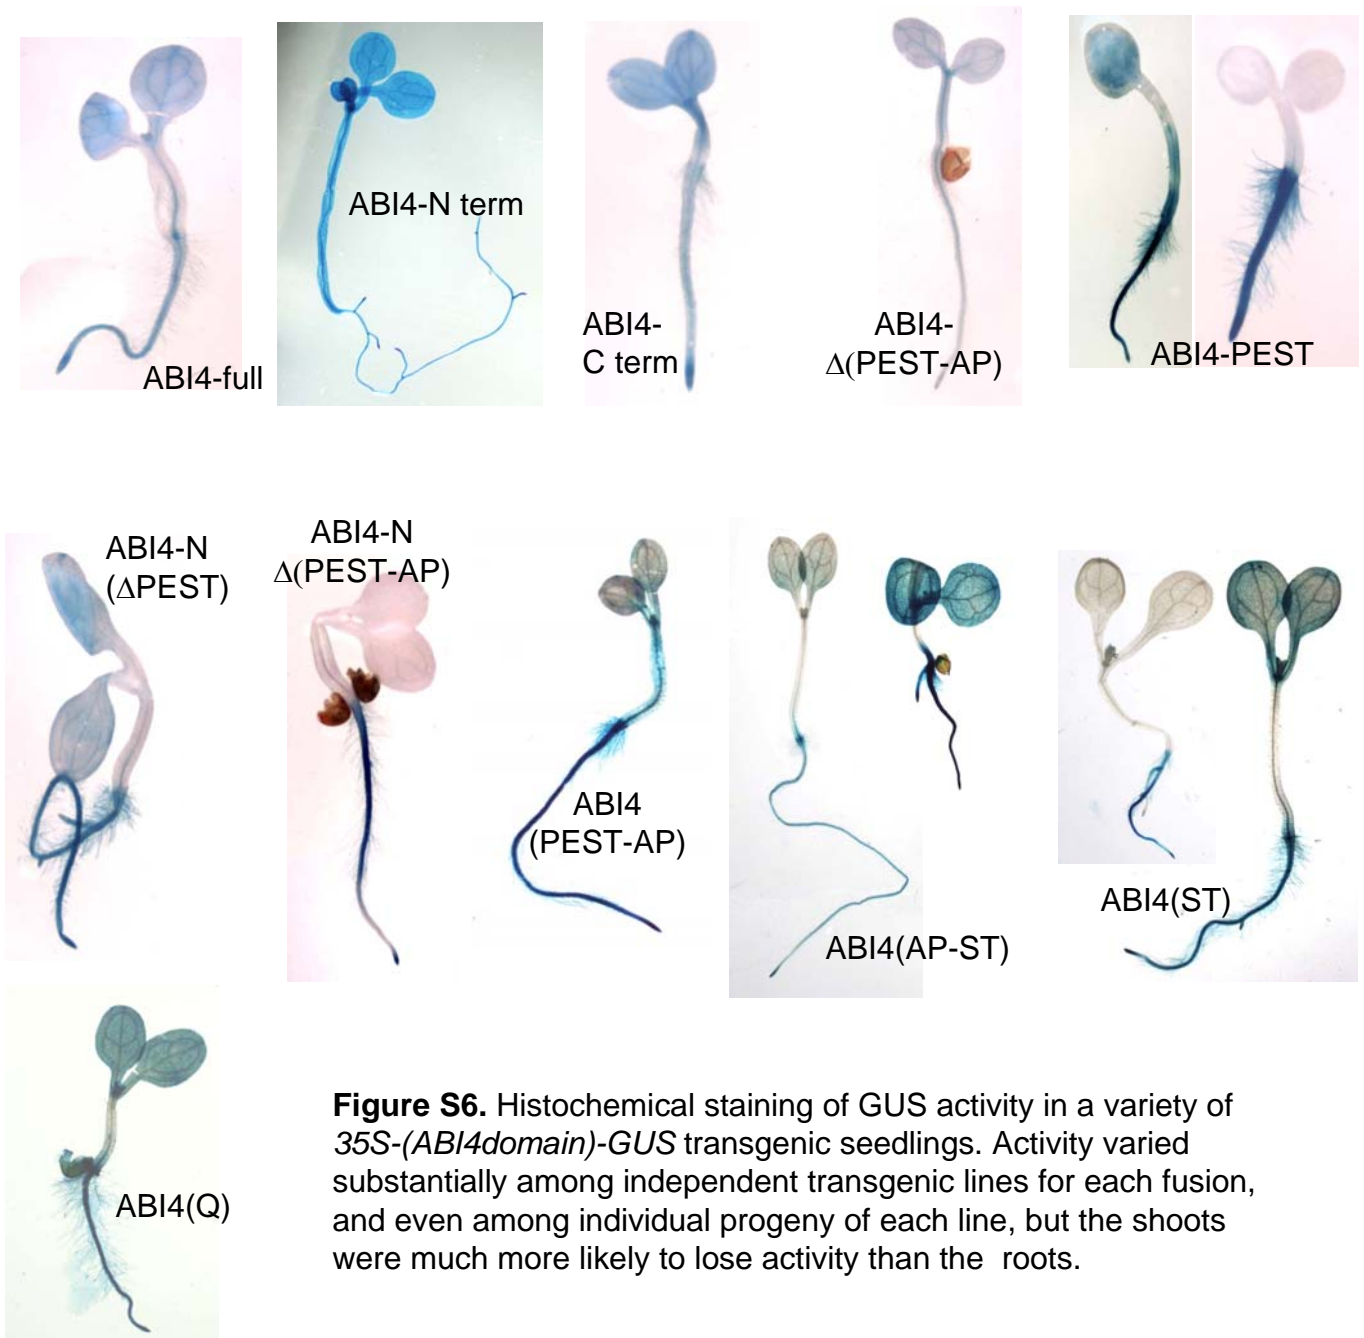

**Figure S6.** Histochemical staining of GUS activity in a variety of *35S-(ABI4domain)-GUS* transgenic seedlings. Activity varied substantially among independent transgenic lines for each fusion, and even among individual progeny of each line, but the shoots were much more likely to lose activity than the roots.



2d GM:

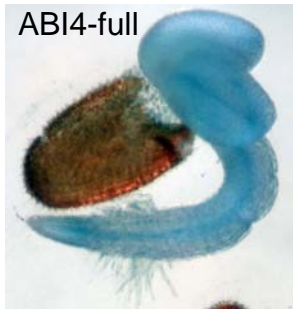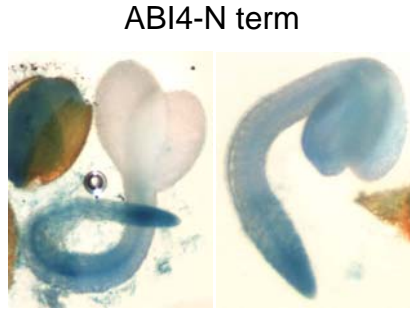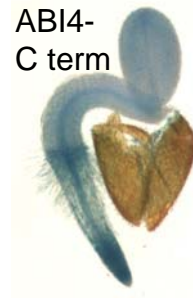

5-9d GM Kn:

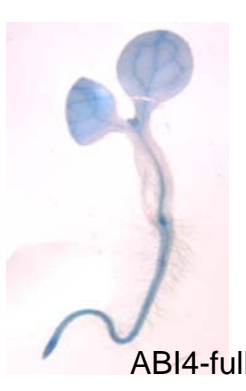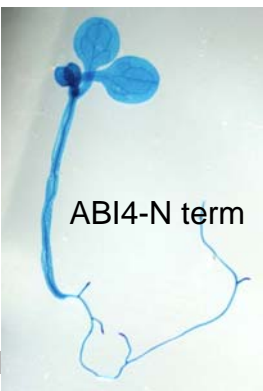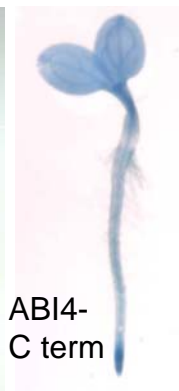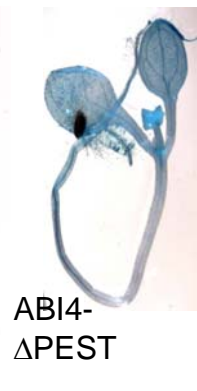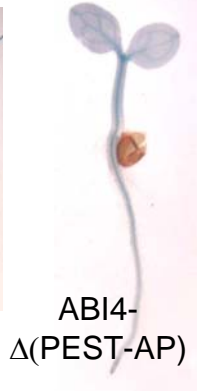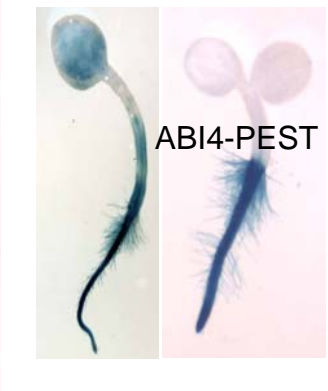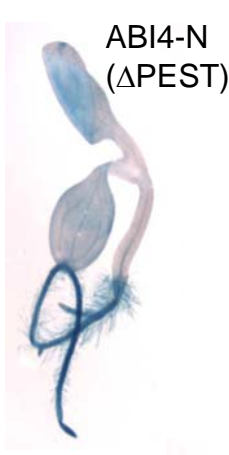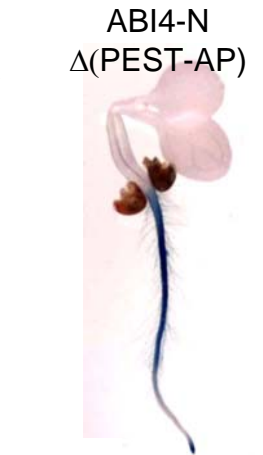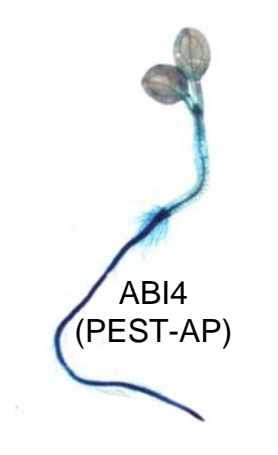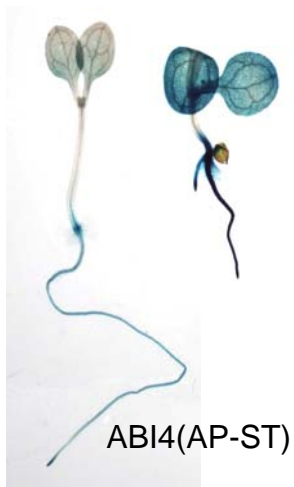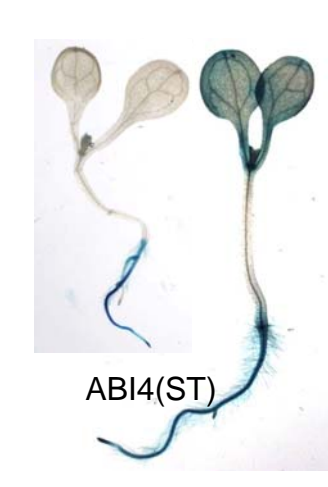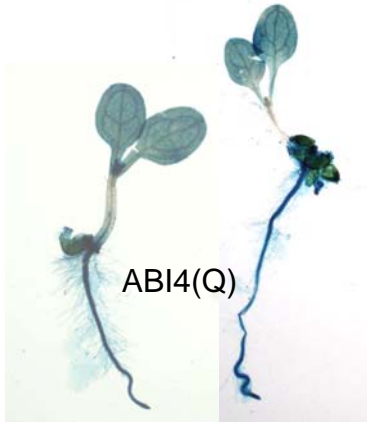

Supplement: supp_err093_00058156-file001.pdf [file supp_err093_00058156-file001.pdf]
